# Supplementary material
Source: PubMed Central journal article supplement (PMC3485880)

Supplementary Information to Fox et al. “Emulsion Based Adjuvants for Malaria Vaccines: Effects of Formulation on Immunogenicity”

This supplementary information contains total IgG antibody titers. Total IgG responses from immunized mice were measured as described in the manuscript. Supplementary Figures 1 and 2 correspond to the IgG1 and IgG2a data in the manuscript Figures 1 and 3, respectively.

**Supplementary Figure 1.** Total IgG antibody endpoint titers induced by PfCelTOS vaccines containing various adjuvant formulations with emulsion doses from 0.02% to 2% v/v oil as measured 3 weeks after the 2<sup>nd</sup> (a) and 3<sup>rd</sup> (b) immunizations, corresponding to IgG1 and IgG2a data in manuscript Figure 1. Each group consisted of 5 mice, with error bars representing the standard deviation of the mean. \*p<0.05 vs. CelTOS alone, #p<0.05 vs. same % oil +/- GLA, §p<0.05 vs. 2% SE, †p<0.05 vs. GLA-AF, ‡p<0.05 vs. Montanide.

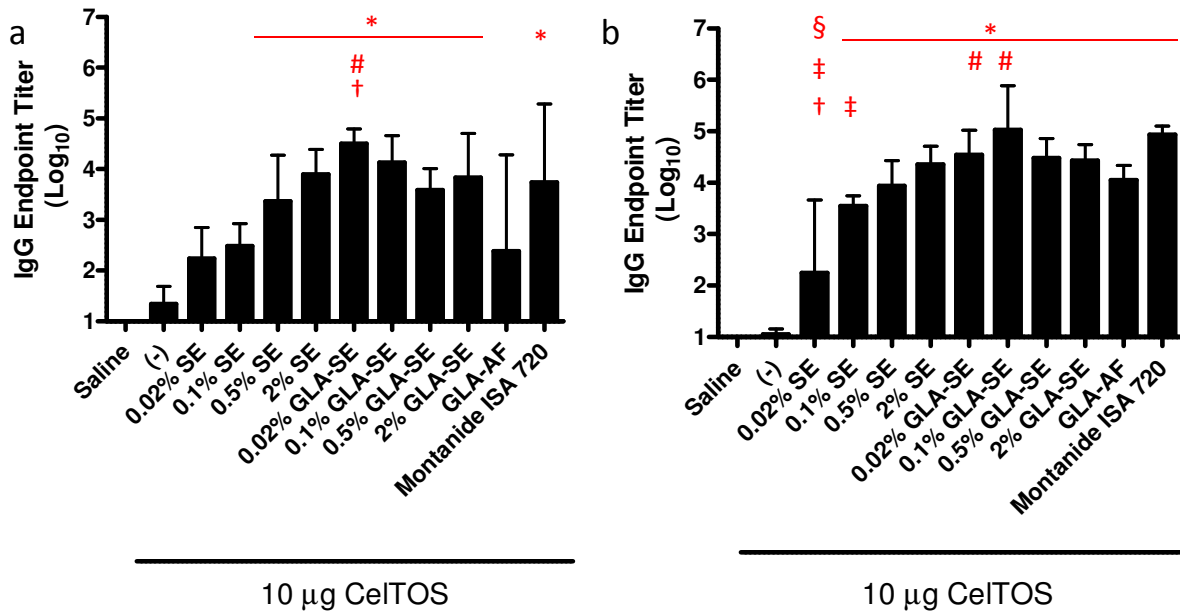

**Supplementary Figure 2.** Total IgG antibody endpoint titers induced by PfCelTOS vaccines containing various adjuvant formulations with emulsion doses from 0.5% to 2% v/v oil as measured 3 weeks after the 2<sup>nd</sup> (a) and 3<sup>rd</sup> (b) immunizations, corresponding to IgG1 and IgG2a data in manuscript Figure 3. Each group consisted of 5 mice, with error bars representing the standard deviation of the mean. \*p<0.05 vs. CelTOS alone, #p<0.05 vs. same % oil +/- GLA, ‡p<0.05 vs. Montanide.

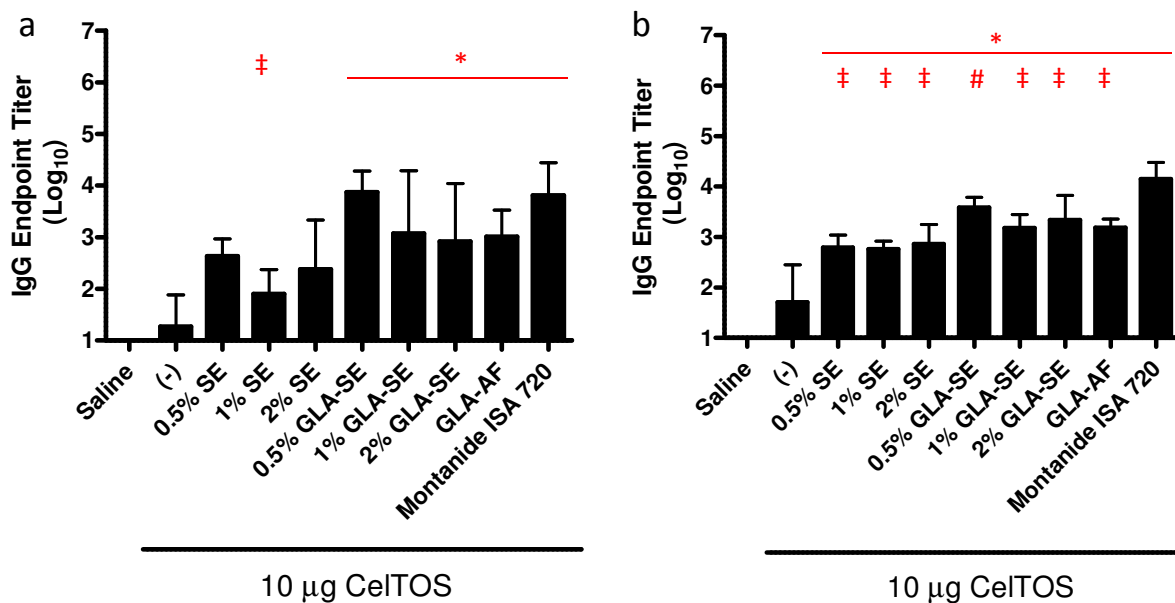

Supplement: CVI.00235-12_zcd999094564so1.pdf [file CVI.00235-12_zcd999094564so1.pdf]
